# Supplementary material for: Development of the Demotivating Beliefs Inventory and Test of the Cognitive Triad of Amotivation
Source: Springer Nature journal article supplement (doi:10.1007/s10608-018-9940-7), 2018-07-10
Supplement: MOESM1 [file 15943786]

Supplemental Material

Figure 1. Screeplot depicting Eigenvalues of components explaining variance in 49 selected items in study one. Here we decided to follow a three-factor solution with Eigenvalues > 2.5, explaining 41 % of variance in beliefs.

*Overview of the 43-item version of the Demotivating Beliefs Inventory and factor loadings of items in the final model*

| Scale | German item version | English item version | Item number | Factor number | Factor loading |
| --- | --- | --- | --- | --- | --- |
| DAS | Wenn ich nicht so gut bin, wie andere Leute, dann heißt das, dass ich ein Mensch von geringerem Wert bin | If I do not do as well as other people, it means I am an inferior human being | 30 | 1 | .806 |
| DAS | Wenn ich nicht ständig gut bin, dann werden mich die anderen nicht achten | If I do not do well all the time, people will not respect me | 37 | 1 | .757 |
| DAS | Wenn ich bei meiner Arbeit versage, dann bin ich als ganzer Mensch ein Versager | If I fail at my work, then I am a failure as a person | 21 | 1 | .729 |
| DAS | Wenn ich teilweise versage, dann ist das genauso schlimm, als wenn es ein kompletter Misserfolg wäre | If I fail partly, it is as bad as being a complete failure | 27 | 1 | .711 |
| DAS | Die Leute denken schlecht über mich, wenn ich einen Fehler mache | People will probably think less of me if 1 make a mistake | 29 | 1 | .704 |
| DAS | Wenn ich eine wertvolle Person sein will, dann muss ich auf mindestens einem Gebiet herausragend sein | If I am to be a worthwhile person, I must be truly outstanding in at least one major respect | 41 | 1 | .681 |
| DAS | Wenn man etwas nicht richtig und perfekt tun kann, dann hat es überhaupt keinen Sinn, die Sache anzufangen | If you cannot do something well, there is little point in doing it at all | 26 | 1 | .618 |
| DAS | Selbst ein geringes Risiko einzugehen ist dumm, denn wenn man verliert, ist das eine Katastrophe | Taking even a small risk is foolish because the loss is likely to be a  disaster | 38 | 1 | .614 |
| DAS | Ich bin nur dann glücklich, wenn die meisten Leute, die ich kenne, mich bewundern | I cannot be happy unless most people I know admire me | 15 | 1 | .610 |
| DAS | Wenn andere Menschen wüssten, wie man wirklich ist, dann würden sie schlecht von einem denken | If other people know what you’re really like, they will think less of you | 4 | 1 | .598 |
| RSE | Ich fühle mich von Zeit zu Zeit richtig nutzlos | I certainly feel useless at times | 19 | 1 | .540 |
| DAS | Wenn ich nicht den höchsten Anspruch an mich stelle, dann ende ich als zweitrangiger Mensch | If I don't set the highest standards for myself, I am likely to end up  a second-rate person | 2 | 1 | .525 |
| DAS | Wenn ich eine Frage stelle, dann ist dies ein Zeichen von Unterlegenheit | If I ask a question, it makes me look inferior | 14 | 1 | .522 |
| DAS | Wenn jemand nicht meiner Meinung ist, bedeutet das, dass er mich nicht mag | If someone disagrees with me, it probably indicates he does not like me | 3 | 1 | .508 |
| RSE | Ich habe eine positive Einstellung zu mir selbst gefunden (r) | I take a positive attitude toward myself (r) | 45 | 1 | .496 |
| DAS | Es ist gut seine eigenen Interessen aufzugeben um anderen Leuten zu gefallen | It is best to give up your own interests in order to please other people | 48 | 1 | .463 |
| RSE | Alles in allem bin ich mit mir selbst zufrieden (r) | On the whole, I am satisfied with myself (r) | 44 | 1 | .453 |
| RSE | Ich besitze eine Reihe guter Eigenschaften (r) | I feel that I have a number of good qualities (r) | 1 | 1 | .445 |
| DAS | Menschen, die gute Ideen haben, sind mehr wert, als solche, die keine guten Ideen haben | People who have good ideas are better than those who do not | 13 | 1 | .445 |
| RSE | Ich halte mich für einen wertvollen Menschen, jedenfalls bin ich nicht weniger wertvoll als andere Menschen auch (r) | I feel that I'm a person of worth (r) | 49 | 1 | .382 |
| RSE | Ich kann vieles genauso gut wie die meisten anderen Menschen auch (r) | I am able to do things as well as most other people (r) | 12 | 1 | .331 |
| DAS | Ich kann anderen Menschen nicht vertrauen, denn sie könnten grausam mir gegenüber sein | I cannot trust other people because they might be cruel to me | 10 | 2 | .702 |
| ABS | Leute sind gewöhnlich besser dran, wenn sie sich von emotionalen Bindungen mit den meisten anderen Leuten fernhalten | People are usually better off if they stay aloof from emotional involvements with most others | 28 | 2 | .661 |
| ABS | Neue Freundschaften zu schließen ist die Mühe nicht wert | Making new friends isn't worth the energy it takes | 25 | 2 | .622 |
| SSES | Ich habe Schwierigkeiten, mich in sozialen Situationen angemessen zu verhalten | I do not handle myself well in social gatherings | 11 | 2 | .621 |
| SSES | Es ist schwierig für mich neue Freundschaften zu schließen | It is difficult for me to make new friends | 42 | 2 | .593 |
| DAS | Wenn ein Mensch um Hilfe bittet, dann ist das ein Zeichen von Schwäche | If a person asks for help, it is a sign of weakness | 22 | 2 | .562 |
| ABS | Ich bevorzuge Hobbys und Freizeitaktivitäten, die keine anderen Personen involvieren | I prefer hobbies and leisure activities that do not involve other people | 17 | 2 | .550 |
| ABS | Ich ziehe Fernsehen dem Ausgehen mit anderen Leuten vor | I prefer watching television to going out with other people | 9 | 2 | .432 |
| DAS | Wenn eine Person Probleme vermeidet, dann werden die Probleme wahrscheinlich verschwinden. | If a person avoids problems, the problems tend to go away | 47 | 2 | .417 |
| ABS | In vielerlei Hinsicht ziehe ich die Gesellschaft von Tieren der Gesellschaft anderer Leute vor | In many ways, I prefer the company of pets to the company of people | 35 | 2 | .410 |
| SSES | Wenn ich eine interessante Person sehe, mit der es schwer ist, Freundschaft zu schließen, werde ich bald aufhören zu versuchen mich mit ihr anzufreunden | If I meet someone interesting who is hard to make friends with, I’ll soon stop trying to make friends with that person | 32 | 2 | .377 |
| ABS | Leute denken manchmal, ich wäre schüchtern, wenn ich in Wirklichkeit nur alleine gelassen werden möchte | People sometimes think I am shy when I really just want to be left  alone | 40 | 2 | .307 |
| ABS | Enge Freunde zu haben ist nicht so wichtig wie die meisten Leute sagen | Having close friends is not as important as most people say | 43 | 2 | .285 |
| ABS | Ich lege sehr wenig Wert darauf, enge Freunde zu haben | I attach very little importance to having close friends | 16 | 2 | .243 |
| SSES | Wenn ich dabei bin mich mit jemandem anzufreunden, der zunächst kein Interesse zeigt, gebe ich nicht so leicht auf (r) | When I am trying to become friends with someone who seems uninterested at first, I don’t give up easily (r) | 7 | 2 | .226 |
| ABS | Ich könnte glücklich damit sein, ganz alleine in einer Hütte in den Wäldern oder Bergen zu leben | I could be happy living all alone in a cabin in the woods or mountains | 23 | 2 | .215 |
| TEPS | Ich freue mich auf sehr viele bevorstehende Dinge in meinem Leben (r) | I look forward to a lot of things in my life (r) | 5 | 3 | .806 |
| TEPS | Über Vorfreude an sich freue ich mich schon (r) | Looking forward to a pleasurable experience is in itself pleasurable (r) | 6 | 3 | .603 |
| TEPS | Wenn ein aufregendes Ereignis ansteht, freue ich mich sehr darauf (r) | When something exciting is coming up  in my life, I really look forward to it (r) | 31 | 3 | .536 |
| TEPS | Plane ich meine Lieblingsspeise zu essen, kann ich schon fast schmecken, wie lecker sie ist (r) | When I think about eating my favorite  food, I can almost taste how good it is (r) | 34 | 3 | .370 |
| TEPS | Bestelle ich ein Gericht von der Speisekarte, stelle ich mir schon vor, wie gut es schmecken wird (r) | When ordering something of the  menu, I imagine how good it will taste (r) | 33 | 3 | .333 |
| SSES | Wenn ich jemanden sehe, den ich gerne kennenlernen würde, gehe ich selbst auf diese Person zu, anstelle darauf zu warten, dass er/sie auf mich zukommt (r) | If I see someone I would like to meet, I go to that person instead of waiting for him or her to come to me (r) | 36 | 3 | .320 |

*Note*. DAS = Dysfunctional Attitude Scale; SSES = Social Self-Efficacy Scale; ABS = Asociality Beliefs Scale; RSE = Rosenberg Self-Esteem Scale; TEPS = Temporal Experience of Pleasure Scale. (r) = reversed scored item. Factor 1 = Self-defeating beliefs; factor 2 = Social indifference beliefs; factor 3 = Low-expectancy-of-pleasure beliefs.
